# Supplementary material
Source: Elsevier journal article supplement (https://comptes-rendus.academie-sciences.fr/geoscience/article/10.1016/j.crte.2017.02.003/file/attach/mmc2.pdf)
Supplement: mmc2 [file mmc2.pdf]

|               |          |             |                              |         |        |  |
|---------------|----------|-------------|------------------------------|---------|--------|--|
| Sample ID:    | Ludières | Lab# N-1436 | J = 0.000825100 ± 0.00000413 |         |        |  |
| Sanidine      |          |             | Irradiation # 68             | reactor | OSIRIS |  |
| Flux standard | ACS-2    | 1.193 Ma    |                              |         |        |  |

| Lab. N°  | <sup>40</sup> Ar<br>(moles) | <sup>36</sup> Ar<br>V | %1σ  | <sup>37</sup> Ar<br>V | %1σ    | <sup>38</sup> Ar<br>V | %1σ  | <sup>39</sup> Ar<br>V | %1σ  | <sup>40</sup> Ar<br>V | %1σ  | D <sup>(1)</sup> | ±%SD | <sup>40</sup> Ar* | Age<br>(ka) | ±1σ<br>(ka) | K/Ca ± 1σ   |
|----------|-----------------------------|-----------------------|------|-----------------------|--------|-----------------------|------|-----------------------|------|-----------------------|------|------------------|------|-------------------|-------------|-------------|-------------|
| N1436-01 | 1.388E-14                   | 4.793E-06             | 0.87 | 6.011E-05             | 465.19 | 7.631E-05             | 0.34 | 4.694E-03             | 0.15 | 1.013E-02             | 0.04 | 1.0138           | 0.1  | 86.0              | 2760        | 12          | 35.1 ± 45.5 |
| N1436-02 | 1.313E-14                   | 8.621E-07             | 2.46 | 7.216E-05             | 390.67 | 7.829E-05             | 0.31 | 4.970E-03             | 0.13 | 9.587E-03             | 0.07 | 1.0137           | 0.1  | 97.4              | 2795        | 11          | 31.0 ± 40.4 |
| N1436-03 | 1.021E-14                   | 7.674E-07             | 3.82 | 4.819E-05             | 576.98 | 6.234E-05             | 0.41 | 3.852E-03             | 0.13 | 7.456E-03             | 0.09 | 1.0131           | 0.1  | 97.0              | 2793        | 14          | 36.0 ± 69.2 |
| N1436-04 | 1.303E-14                   | 9.353E-07             | 2.57 | 8.929E-05             | 337.45 | 7.610E-05             | 0.54 | 4.983E-03             | 0.12 | 9.509E-03             | 0.06 | 1.0137           | 0.1  | 97.2              | 2758        | 12          | 25.1 ± 28.2 |
| N1436-05 | 1.373E-14                   | 1.596E-06             | 1.09 | 6.380E-05             | 465.19 | 8.217E-05             | 0.47 | 5.137E-03             | 0.13 | 1.003E-02             | 0.05 | 1.0138           | 0.1  | 95.3              | 2768        | 11          | 36.2 ± 56.2 |
| N1436-06 | 1.374E-14                   | 8.853E-06             | 0.55 | 7.656E-05             | 390.67 | 6.538E-05             | 0.35 | 3.972E-03             | 0.13 | 1.003E-02             | 0.05 | 1.0138           | 0.1  | 73.8              | 2770        | 15          | 23.3 ± 30.4 |
| N1436-07 | 1.155E-14                   | 1.854E-06             | 0.88 | 1.022E-04             | 297.54 | 6.766E-05             | 0.48 | 4.237E-03             | 0.14 | 8.430E-03             | 0.06 | 1.0134           | 0.1  | 93.6              | 2770        | 14          | 18.7 ± 18.5 |
| N1436-08 | 1.013E-14                   | 6.704E-07             | 2.45 | 6.394E-05             | 465.19 | 6.201E-05             | 0.50 | 3.819E-03             | 0.13 | 7.397E-03             | 0.06 | 1.0131           | 0.1  | 97.4              | 2807        | 15          | 26.9 ± 41.7 |
| N1436-09 | 1.040E-14                   | 3.375E-07             | 3.60 | 6.393E-05             | 465.19 | 6.444E-05             | 0.41 | 3.959E-03             | 0.14 | 7.594E-03             | 0.08 | 1.0131           | 0.1  | 98.8              | 2819        | 14          | 27.9 ± 43.2 |
| N1436-10 | 9.032E-15                   | 2.091E-06             | 1.31 | 3.839E-05             | 763.30 | 5.043E-05             | 0.40 | 3.143E-03             | 0.13 | 6.593E-03             | 0.08 | 1.0129           | 0.1  | 90.6              | 2827        | 17          | 36.8 ± 93.7 |
| N1436-11 | 9.036E-15                   | 8.631E-07             | 2.18 | 5.118E-05             | 576.98 | 5.581E-05             | 0.48 | 3.390E-03             | 0.14 | 6.595E-03             | 0.08 | 1.0129           | 0.1  | 96.2              | 2784        | 16          | 29.8 ± 57.3 |
| N1436-12 | 1.539E-14                   | 3.146E-06             | 1.21 | 5.737E-05             | 514.87 | 8.257E-05             | 0.40 | 5.275E-03             | 0.12 | 1.123E-02             | 0.07 | 1.0141           | 0.1  | 91.7              | 2904        | 11          | 41.4 ± 71.0 |
| N1436-13 | 8.044E-15                   | 1.672E-06             | 1.73 | 9.139E-05             | 520.78 | 4.683E-05             | 0.60 | 2.903E-03             | 0.17 | 5.872E-03             | 0.10 | 1.0128           | 0.1  | 91.7              | 2759        | 29          | 14.3 ± 24.8 |
| N1436-14 | 1.007E-14                   | 4.465E-06             | 0.72 | 1.421E-04             | 187.44 | 5.303E-05             | 0.36 | 3.231E-03             | 0.15 | 7.351E-03             | 0.11 | 1.0132           | 0.1  | 82.1              | 2778        | 16          | 10.2 ± 6.4  |
| N1436-15 | 8.125E-15                   | 1.436E-06             | 0.95 | 5.222E-05             | 653.80 | 4.705E-05             | 0.45 | 2.950E-03             | 0.13 | 5.930E-03             | 0.08 | 1.0128           | 0.1  | 92.9              | 2777        | 21          | 25.4 ± 55.4 |
| N1436-16 | 1.078E-14                   | 6.222E-07             | 1.70 | 1.043E-04             | 246.97 | 6.586E-05             | 0.38 | 4.109E-03             | 0.14 | 7.865E-03             | 0.08 | 1.0132           | 0.1  | 97.8              | 2785        | 12          | 17.7 ± 14.6 |

| Results       | 40Ar*/39Ark ± 1σ       | Age<br>(ka)         | ± 1σ<br>(ka) | MSWD<br>(n) | K/Ca ± 1σ           | Blank corrections |                       |          |                       |          |                       |          |                       |          |                       |          |          |
|---------------|------------------------|---------------------|--------------|-------------|---------------------|-------------------|-----------------------|----------|-----------------------|----------|-----------------------|----------|-----------------------|----------|-----------------------|----------|----------|
|               |                        |                     |              |             |                     | N                 | <sup>36</sup> Ar<br>V | ±1σ<br>V | <sup>37</sup> Ar<br>V | ±1σ<br>V | <sup>38</sup> Ar<br>V | ±1σ<br>V | <sup>39</sup> Ar<br>V | ±1σ<br>V | <sup>40</sup> Ar<br>V | ±1σ<br>V |          |
| weighted mean | 1.866 ± 0.0027 ± 0.14% | 2776                | 14           | 0.90        | 12                  | 27.2 8.9          | N1436-01              | 2.03E-07 | 1.77E-08              | 1.00E-08 | 1.00E-09              | 6.29E-08 | 1.10E-08              | 9.68E-07 | 2.31E-07              | 6.55E-05 | 5.05E-07 |
|               |                        | Full External Error | 37           | 0.98        | Statistical T ratio |                   | N1436-02              | 2.29E-07 | 1.74E-08              | 1.00E-08 | 1.00E-09              | 5.78E-08 | 2.07E-08              | 1.75E-06 | 1.92E-07              | 5.00E-05 | 7.55E-07 |
|               |                        | Analytical Error    | 4            |             |                     |                   | N1436-03              | 2.29E-07 | 1.74E-08              | 1.00E-08 | 1.00E-09              | 5.78E-08 | 2.07E-08              | 1.75E-06 | 1.92E-07              | 5.00E-05 | 7.55E-07 |
|               |                        |                     |              |             |                     |                   | N1436-04              | 1.67E-07 | 4.58E-09              | 1.00E-08 | 1.00E-09              | 3.77E-08 | 1.12E-08              | 1.42E-07 | 7.48E-08              | 4.46E-05 | 5.66E-07 |
|               |                        |                     |              |             |                     |                   | N1436-05              | 1.67E-07 | 4.58E-09              | 1.00E-08 | 1.00E-09              | 3.77E-08 | 1.12E-08              | 1.42E-07 | 7.48E-08              | 4.46E-05 | 5.66E-07 |
|               |                        |                     |              |             |                     |                   | N1436-06              | 1.48E-07 | 1.04E-08              | 1.00E-08 | 1.00E-09              | 4.27E-08 | 1.62E-08              | 6.59E-07 | 6.58E-07              | 2.84E-05 | 7.31E-07 |
|               |                        |                     |              |             |                     |                   | N1436-07              | 1.48E-07 | 1.04E-08              | 1.00E-08 | 1.00E-09              | 4.27E-08 | 1.62E-08              | 6.59E-07 | 6.58E-07              | 2.84E-05 | 7.31E-07 |
|               |                        |                     |              |             |                     |                   | N1436-08              | 1.48E-07 | 1.04E-08              | 1.00E-08 | 1.00E-09              | 4.27E-08 | 1.62E-08              | 6.59E-07 | 6.58E-07              | 2.84E-05 | 7.31E-07 |
|               |                        |                     |              |             |                     |                   | N1436-09              | 1.48E-07 | 1.04E-08              | 1.00E-08 | 1.00E-09              | 4.27E-08 | 1.62E-08              | 6.59E-07 | 6.58E-07              | 2.84E-05 | 7.31E-07 |
|               |                        |                     |              |             |                     |                   | N1436-10              | 2.11E-07 | 1.62E-08              | 1.00E-08 | 1.00E-09              | 3.99E-08 | 9.10E-09              | 2.74E-07 | 7.96E-08              | 2.71E-05 | 4.17E-08 |
|               |                        |                     |              |             |                     |                   | N1436-11              | 2.11E-07 | 1.62E-08              | 1.00E-08 | 1.00E-09              | 3.99E-08 | 9.10E-09              | 2.74E-07 | 7.96E-08              | 2.71E-05 | 4.17E-08 |
|               |                        |                     |              |             |                     |                   | N1436-12              | 2.11E-07 | 1.62E-08              | 1.00E-08 | 1.00E-09              | 3.99E-08 | 9.10E-09              | 2.74E-07 | 7.96E-08              | 2.71E-05 | 4.17E-08 |
|               |                        |                     |              |             |                     |                   | N1436-13              | 1.50E-07 | 7.48E-09              | 1.51E-08 | 1.51E-09              | 3.27E-08 | 1.12E-08              | 7.07E-07 | 9.26E-08              | 3.22E-05 | 1.93E-07 |
|               |                        |                     |              |             |                     |                   | N1436-14              | 1.50E-07 | 7.48E-09              | 1.51E-08 | 1.51E-09              | 3.27E-08 | 1.12E-08              | 7.07E-07 | 9.26E-08              | 3.22E-05 | 1.93E-07 |
|               |                        |                     |              |             |                     |                   | N1436-15              | 1.25E-07 | 7.49E-09              | 1.32E-08 | 1.32E-09              | 7.68E-08 | 8.45E-09              | 1.83E-06 | 1.32E-07              | 4.17E-05 | 4.58E-07 |
|               |                        |                     |              |             |                     |                   | N1436-16              | 1.25E-07 | 7.49E-09              | 1.32E-08 | 1.32E-09              | 7.68E-08 | 8.45E-09              | 1.83E-06 | 1.32E-07              | 4.17E-05 | 4.58E-07 |

| Results          | 40(a)/36(a) ± 1σ | 40(r)/39(k) ± 1σ        | Age ± 1σ<br>(ka) | MSWD |
|------------------|------------------|-------------------------|------------------|------|
| Inverse Isochron | 295 5<br>1.55%   | 1.8680 ± 0.0004 ± 0.19% | 2778 15          | 0.9  |
|                  |                  | Full External Error     | 37               |      |
|                  |                  | Analytical Error        | 5                |      |
